# Supplementary material
Source: PubMed Central journal article supplement (PMC2892369)

A.

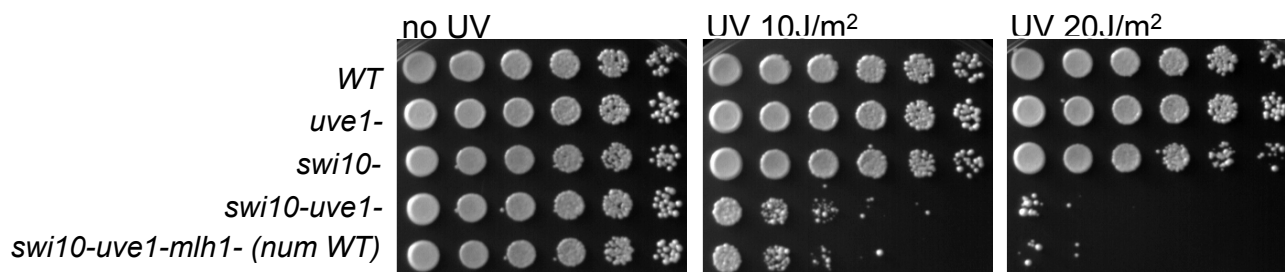

B.

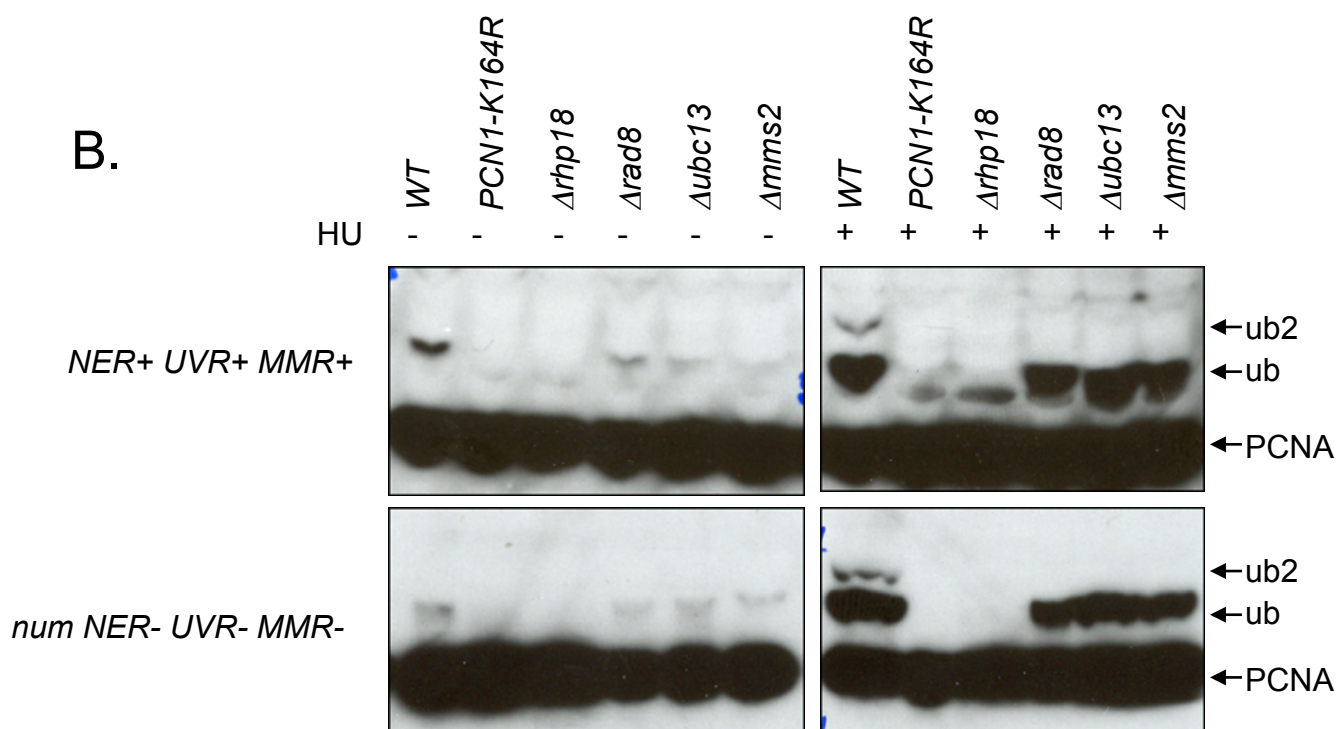

Supplement: emboj201087s1.pdf [file emboj201087s1.pdf]
